# Supplementary material for: Ab initio molecular dynamics determination of competitive O2vs. N2 adsorption at open metal sites of M2(dobdc)
Source: Royal Society of Chemistry journal article supplement (doi:10.1039/c6cp00768f), 2016-01-01
Supplement: c6cp00768f3.pdf [file c6cp00768f3.pdf]

## Electronic Supplementary Information

### Using *Ab Initio* Molecular Dynamics to Examine Competitive O<sub>2</sub>/N<sub>2</sub> Adsorption at Open Metal Sites of M<sub>2</sub>(dobdc)

Marie V. Parkes,<sup>a</sup> Jeffery A. Greathouse,<sup>a</sup> David B. Hart,<sup>a</sup> Dorina F. Sava Gallis,<sup>b</sup> and Tina M. Nenoff<sup>c</sup>

---

<sup>a</sup> Geochemistry Department, Sandia National Laboratories, Albuquerque, New Mexico 87185-0754, United States.

<sup>b</sup> Nanoscale Sciences Department, Sandia National Laboratories, Albuquerque, New Mexico, 87185-1415, United States.

<sup>c</sup> Physical Chemical and Nano Sciences Center, Sandia National Laboratories, Albuquerque, New Mexico, 87185-1415, United States.

---

#### Contents

|                                                                                                                |   |
|----------------------------------------------------------------------------------------------------------------|---|
| Figure ESI-1 Average M-O <sub>2</sub> bond distances .....                                                     | 2 |
| Figure ESI-2 Average M-N <sub>2</sub> bond distances.....                                                      | 3 |
| Figure ESI-3 Average M-O-O angles.....                                                                         | 4 |
| Figure ESI-4 Average M-N-N angles .....                                                                        | 5 |
| Figure ESI-5 Time evolution of adsorption for Fe <sub>2</sub> (dobdc)/4:6 O <sub>2</sub> :N <sub>2</sub> ..... | 6 |

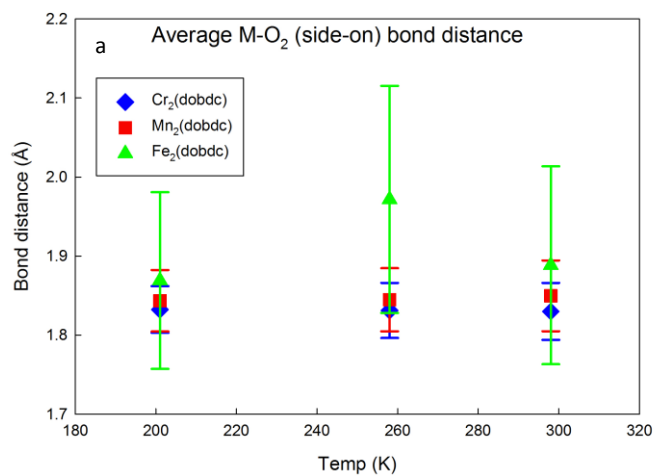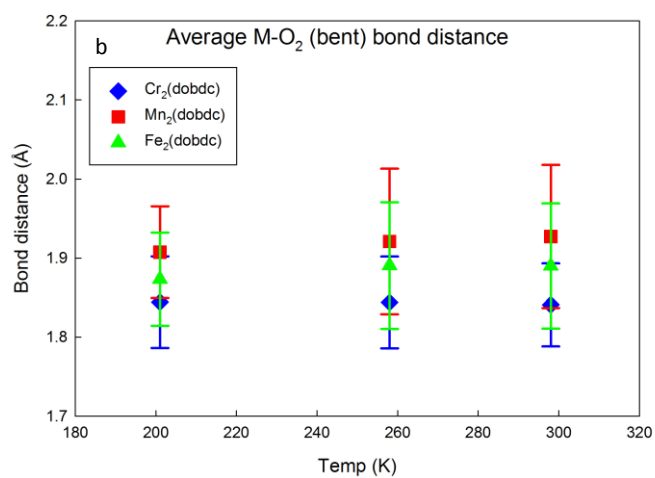

**Figure ESI-1.** Average M-O<sub>2</sub> bond distances for single-component O<sub>2</sub> systems, for (a) side-on bound and (b) bent O<sub>2</sub> molecules. Side-on bound molecules were those with an M-O-O angle between 67° and 80°; bent molecules had M-O-O angles between 80° and 165°.

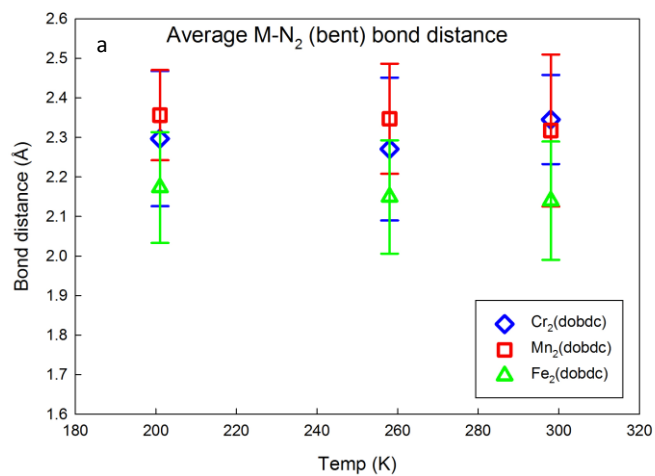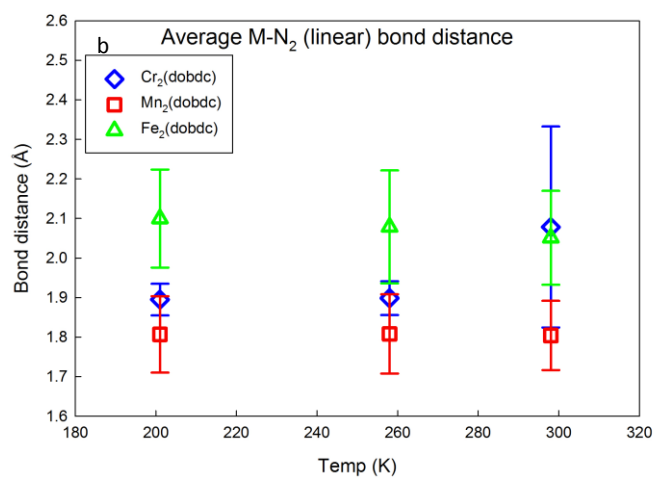

**Figure ESI-2.** Average M-N<sub>2</sub> bond distances for single-component N<sub>2</sub> systems, for (a) bent and (b) linear N<sub>2</sub> molecules. Bent molecules were those with an M-N-N angle between 80° and 165°; linear molecules had M-N-N angles between 165° and 180°.

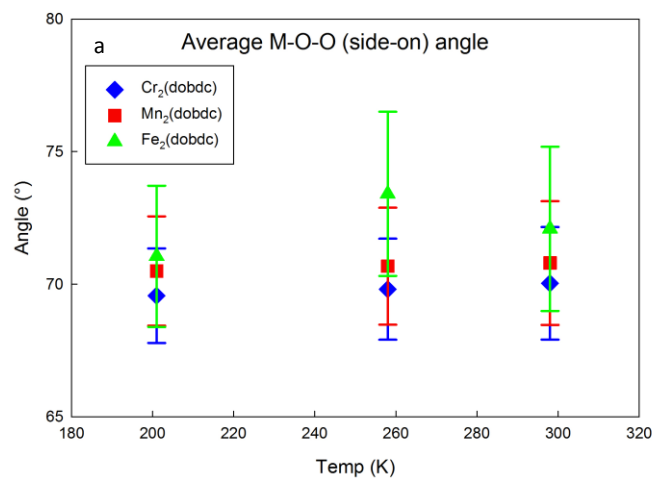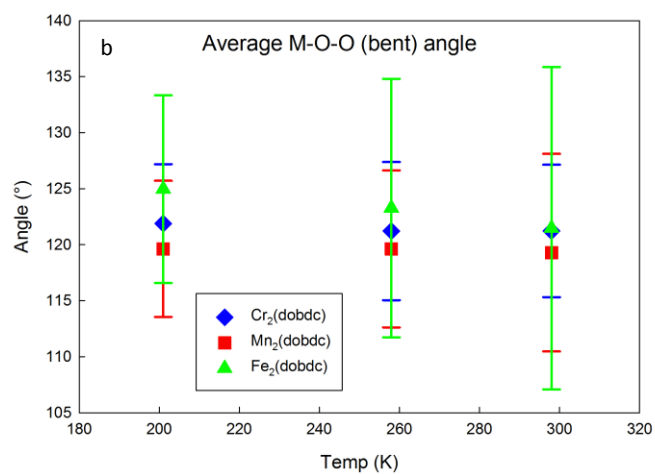

**Figure ESI-3.** Average M-O-O angles for single-component O<sub>2</sub> systems, for (a) side-on and (b) bent O<sub>2</sub> molecules. Side-on bound molecules were those with an M-O-O angle between 67° and 80°; bent molecules had M-O-O angles between 80° and 165°.

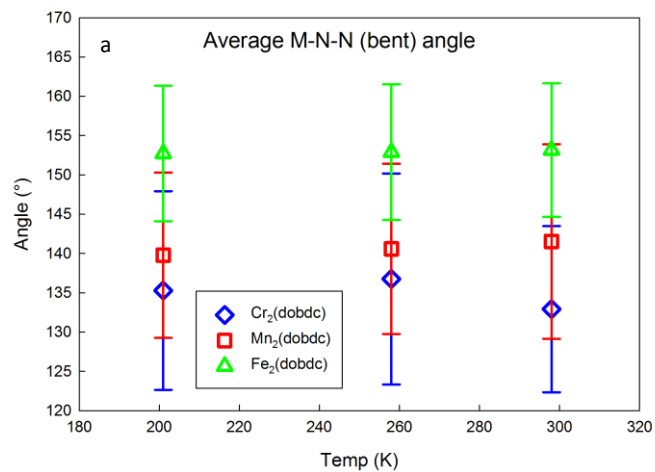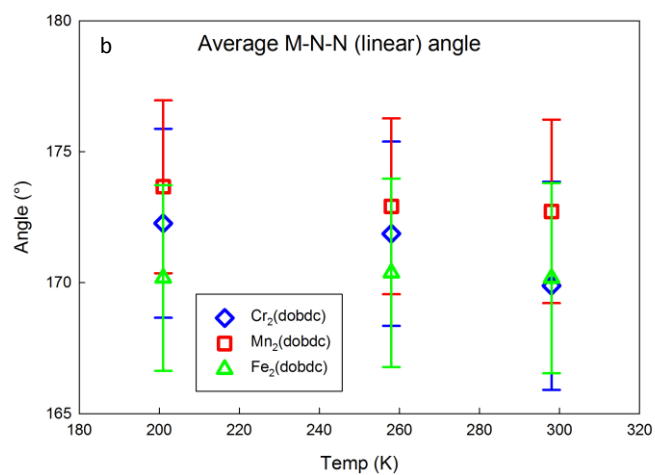

**Figure ESI-4.** Average M-N-N angles for single-component N<sub>2</sub> systems, for (a) bent and (b) linear N<sub>2</sub> molecules. Bent molecules were those with an M-N-N angle between 80° and 165°; linear molecules had M-N-N angles between 165° and 180°.

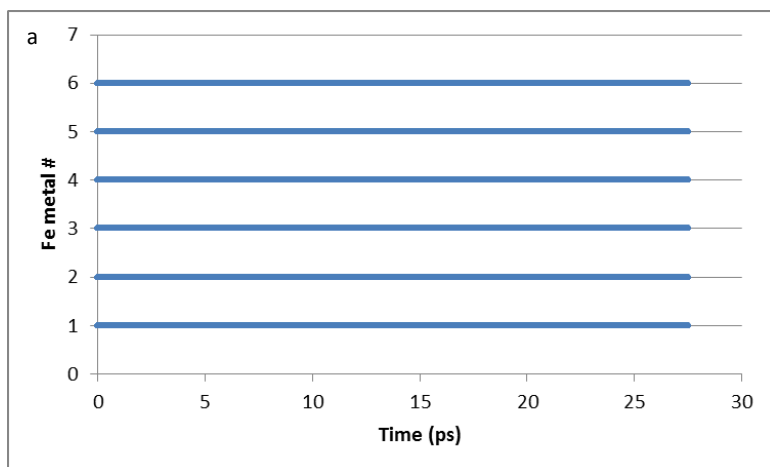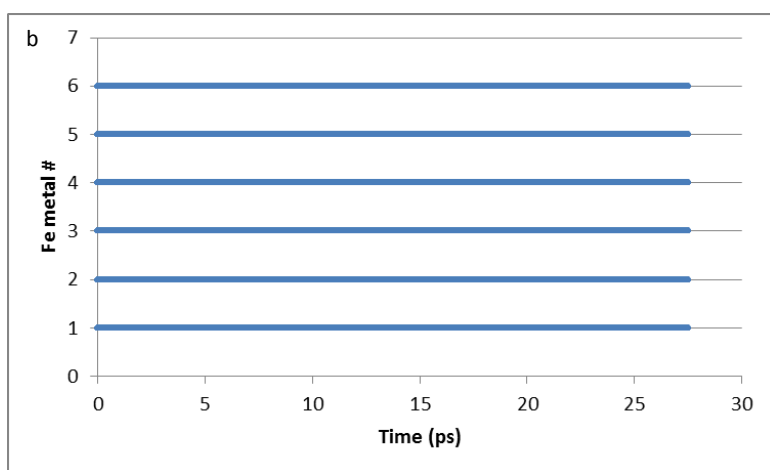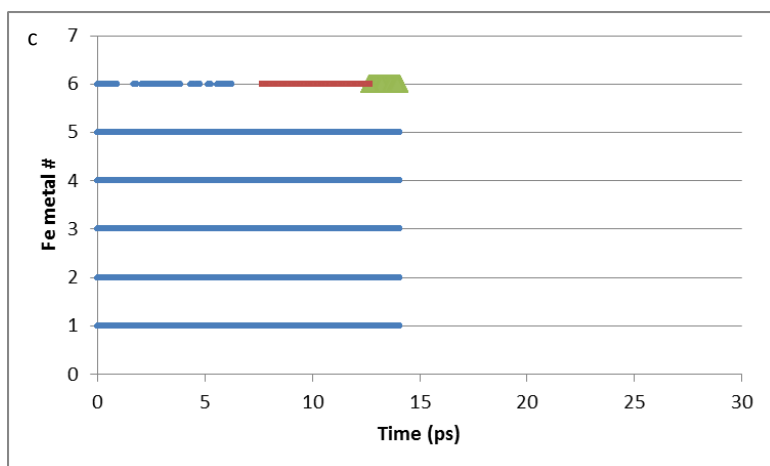

• N<sub>2</sub> bound    ▲ O<sub>2</sub> bound sideon    ■ O<sub>2</sub> bound bent

**Figure ESI-5.** Plots of N<sub>2</sub> and O<sub>2</sub> bound to each Fe metal center of Fe<sub>2</sub>(dobdc) over time, for 4:6 O<sub>2</sub>:N<sub>2</sub> loadings, at (a) 201 K, (b) 258 K, and (c) 298 K. Each simulation begins with six molecules of N<sub>2</sub> bound to the six metal centers and four molecules of O<sub>2</sub> in the center of the pore.
