# Supplementary material for: Ab initio molecular dynamics determination of competitive O2vs. N2 adsorption at open metal sites of M2(dobdc)
Source: Royal Society of Chemistry journal article supplement (doi:10.1039/c6cp00768f), 2016-01-01
Supplement: c6cp00768f4.pdf [file c6cp00768f4.pdf]

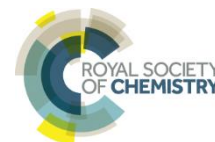

Journal Name

ARTICLE

<Table 2, to be inserted on page 6>

| MOF<br>Gas<br>Temp      | Side-on Bonding |                 |           | Bent Bonding |                 |           | Linear Bonding |                 |           |
|-------------------------|-----------------|-----------------|-----------|--------------|-----------------|-----------|----------------|-----------------|-----------|
|                         | %               | Bond length (Å) | Angle (°) | %            | Bond length (Å) | Angle (°) | %              | Bond length (Å) | Angle (°) |
| Cr <sub>2</sub> (dobdc) |                 |                 |           |              |                 |           |                |                 |           |
| N <sub>2</sub>          |                 |                 |           |              |                 |           |                |                 |           |
| 201 K                   |                 |                 |           | 52.4         | 2.30 ± 0.17     | 135 ± 13  | 47.6           | 1.90 ± 0.04     | 172 ± 4   |
| 258 K                   |                 |                 |           | 51.4         | 2.27 ± 0.18     | 136 ± 13  | 48.6           | 1.90 ± 0.04     | 172 ± 4   |
| 298 K                   |                 |                 |           | 98.1         | 2.35 ± 0.11     | 133 ± 11  | 1.9            | 2.08 ± 0.25     | 170 ± 4   |
| O <sub>2</sub>          |                 |                 |           |              |                 |           |                |                 |           |
| 201 K                   | 70.7            | 1.83 ± 0.03     | 70 ± 2    | 29.3         | 1.84 ± 0.06     | 122 ± 5   |                |                 |           |
| 258 K                   | 40.3            | 1.83 ± 0.03     | 70 ± 2    | 59.7         | 1.84 ± 0.06     | 121 ± 6   |                |                 |           |
| 298 K                   | 40.4            | 1.83 ± 0.04     | 70 ± 2    | 59.6         | 1.84 ± 0.05     | 121 ± 6   |                |                 |           |
| Mn <sub>2</sub> (dobdc) |                 |                 |           |              |                 |           |                |                 |           |
| N <sub>2</sub>          |                 |                 |           |              |                 |           |                |                 |           |
| 201 K                   |                 |                 |           | 48.1         | 2.36 ± 0.11     | 140 ± 11  | 51.9           | 1.81 ± 0.10     | 174 ± 3   |
| 258 K                   |                 |                 |           | 49.1         | 2.35 ± 0.14     | 141 ± 11  | 50.9           | 1.81 ± 0.10     | 173 ± 3   |
| 298 K                   |                 |                 |           | 37.6         | 2.32 ± 0.19     | 142 ± 12  | 62.4           | 1.80 ± 0.09     | 173 ± 4   |
| O <sub>2</sub>          |                 |                 |           |              |                 |           |                |                 |           |
| 201 K                   | 20.2            | 1.84 ± 0.04     | 70 ± 2    | 79.9         | 1.91 ± 0.05     | 120 ± 6   |                |                 |           |
| 258 K                   | 52.3            | 1.84 ± 0.04     | 71 ± 2    | 47.7         | 1.92 ± 0.09     | 120 ± 7   |                |                 |           |
| 298 K                   | 61.0            | 1.85 ± 0.04     | 71 ± 2    | 39.0         | 1.93 ± 0.09     | 119 ± 9   |                |                 |           |
| Fe <sub>2</sub> (dobdc) |                 |                 |           |              |                 |           |                |                 |           |
| N <sub>2</sub>          |                 |                 |           |              |                 |           |                |                 |           |
| 201 K                   |                 |                 |           | 73.5         | 2.17 ± 0.14     | 153 ± 9   | 26.5           | 2.10 ± 0.12     | 170 ± 4   |
| 258 K                   |                 |                 |           | 70.0         | 2.15 ± 0.14     | 153 ± 9   | 30.0           | 2.08 ± 0.14     | 170 ± 4   |
| 298 K                   |                 |                 |           | 71.5         | 2.14 ± 0.15     | 153 ± 9   | 28.5           | 2.05 ± 0.12     | 170 ± 4   |
| O <sub>2</sub>          |                 |                 |           |              |                 |           |                |                 |           |
| 201 K                   | 40.2            | 1.87 ± 0.11     | 71 ± 3    | 59.8         | 1.87 ± 0.06     | 125 ± 8   |                |                 |           |
| 258 K                   | 21.6            | 1.97 ± 0.14     | 73 ± 3    | 78.4         | 1.89 ± 0.08     | 123 ± 12  |                |                 |           |
| 298 K                   | 59.5            | 1.89 ± 0.13     | 72 ± 3    | 40.5         | 1.89 ± 0.08     | 121 ± 14  |                |                 |           |
